# Supplementary material for: The structural elucidation of aqueous H3BO3 solutions by DFT and neutron scattering studies
Source: Royal Society of Chemistry journal article supplement (doi:10.1039/d0cp02306j), 2020-01-01
Supplement: d0cp02306j1.pdf [file d0cp02306j1.pdf]

**Supporting Information for:**

## **Structure of Aqueous H<sub>3</sub>BO<sub>3</sub> Solutions by DFT and Neutron Scattering**

Yongquan Zhou<sup>a,\*</sup>, Toshio Yamaguchi<sup>b</sup>, Wenqian Zhang<sup>a</sup>, Kazutaka Ikeda<sup>c</sup>, Koji Yoshida<sup>b</sup>,

Fayan Zhu<sup>a</sup>, Hongyan Liu<sup>a</sup>

*<sup>a</sup> Key Laboratory of Comprehensive and Highly Efficient Utilization of Salt Lake Resources; Key Laboratory of Salt Lake Resources Chemistry of Qinghai Province; Qinghai Institute of Salt Lakes, Chinese Academy of Sciences, Xining 810008, China*

*<sup>b</sup> Department of Chemistry, Faculty of Science, Fukuoka University, 8-19-1 Nanakuma, Jonan, Fukuoka 814-0180, Japan*

*<sup>c</sup>High Energy Accelerator Research Organization (KEK), Tsukuba, Ibaraki 305-0801, Japan*

All correspondence should be sent to: Dr. Yongquan Zhou,

E-mail. [yongqzhou@163.com](mailto:yongqzhou@163.com)

# 1. Sample Information

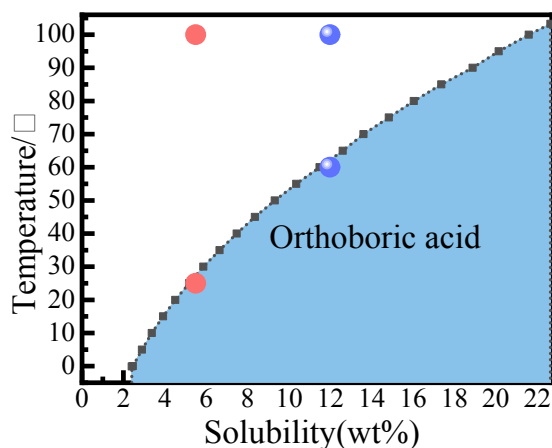

**Fig. S1.** Sample solutions lay in the  $\text{H}_3\text{BO}_3\text{-D}_2\text{O}$  binary

(Based on data from Nies, N. P, *et al. J. Chem. Eng. Data*, 1967, 12 (3), 303-313.<sup>1)</sup>)

In the present work, the deuterated compounds were used to avoid the large incoherent scattering-cross section of H ( $\sigma_1^{\text{H}}=82.03$  barns and  $\sigma_1^{\text{D}}=2.05$  barns). Meantime,  $^{11}\text{B}$  were used to overcome the large absorption of natural boron ( $\sigma_a^{\text{natural B}} = 767.8$  barns and  $\sigma_a^{10\text{B}} = 0.0055$  barns).

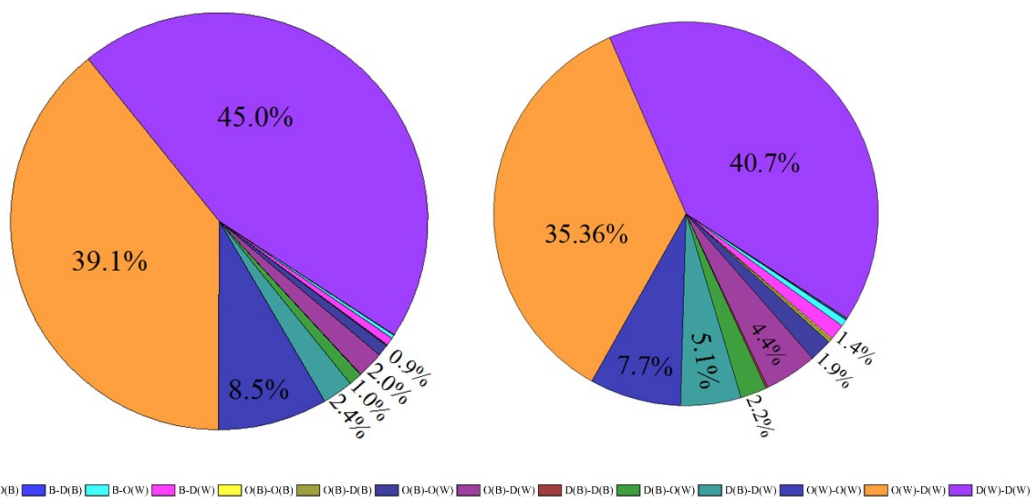

**Fig. S2.** The contribution of each atom pair to the total scattering intensity for aqueous  $^2\text{H}_3^{11}\text{BO}_3$  solutions at different concentration (WSR=57, left and WSR=24, right) by neutron diffraction with  $\lambda$  of 1.798 Å.

## 1 2. Parameters for EPSR

2 **Table S1.** Bond lengths and angles for describing the simulation molecules

|                                    | Bonds/Å |        |          | Angle/° |        |        |         |
|------------------------------------|---------|--------|----------|---------|--------|--------|---------|
|                                    | atom 1  | atom 2 | distance | atom 1  | atom 2 | atom 3 | Angle   |
| <p>H<sub>3</sub>BO<sub>3</sub></p> | O(4)    | H(7)   | 0.965    | H(7)    | O(4)   | B(1)   | 112.652 |
|                                    | O(3)-   | H(6)   | 0.965    | H(6)    | O(3)   | B(1)   | 112.601 |
|                                    | O(2)    | H(5)   | 0.965    | H(5)    | O(2)   | B(1)   | 112.480 |
|                                    | B(1)    | O(4)   | 1.367    | O(4)    | B(1)   | O(3)   | 120.045 |
|                                    | B(1)    | O(3)   | 1.367    | O(4)    | B(1)   | O(2)   | 119.997 |
|                                    | B(1)    | O(2)   | 1.367    | O(3)    | B(1)   | O(2)   | 119.958 |
| <p>H<sub>2</sub>O</p>              | O(1)    | H(2)   | 0.956    | H(2)    | O(1)   | O(3)   | 105.112 |
|                                    | O(1)    | H(3)   | 0.956    |         |        |        |         |

3

4 **Table S2.** Potential parameter values for EPSR modelling

|                                  | B <sup>2</sup> | O(B) <sup>2</sup> | D(B) <sup>2</sup> | O(W) <sup>3</sup> | D(W)   |
|----------------------------------|----------------|-------------------|-------------------|-------------------|--------|
| $\epsilon$ /kJ.mol <sup>-1</sup> | 0.142          | 0.666             | 0.00              | 0.650             | 0.000  |
| $\sigma$ /Å                      | 3.528          | 2.851             | 0.00              | 3.160             | 0.00   |
| Mass                             | 10.810         | 15.9994           | 2.000             | 16.00             | 2.00   |
| Charge                           | 0.474          | -0.368            | 0.210             | -0.8476           | 0.4238 |

5

6 **Table S3.** EPSR simulation setup details.

| Simulation box | # water molecules | #B(OH) <sub>3</sub> molecules | Density /atoms Å <sup>-3</sup> | Box side length /Å | Iterations times |
|----------------|-------------------|-------------------------------|--------------------------------|--------------------|------------------|
| B57W-298       | 1000              | 18                            | 0.09947                        | 31.5572            | 20100            |
| B57W-373       | 1000              | 18                            | 0.09583                        | 31.9518            | 25414            |
| B57W-343       | 1000              | 41                            | 0.09754                        | 32.3002            | 21362            |
| B57W-373       | 1000              | 41                            | 0.09570                        | 32.5057            | 23843            |

7

### 1 3.DFT Calculations

2 **Table S4:** Calculated conformational populations ( $p_i$ , %), energy parameters and bond  
3 parameters of  $2\text{B}(\text{OH})_3 \cdot 6\text{H}_2\text{O}$  conformers at  $\omega\text{b97xd}/6\text{-311++g}(2\text{df},2\text{pd})$  basis level.

4

| isomers |        | $p_i$  | Bond parameters/Å |                          |                          |                          |       | $\Delta G_{PCM}^{inter}$ | Relative energy |
|---------|--------|--------|-------------------|--------------------------|--------------------------|--------------------------|-------|--------------------------|-----------------|
|         |        |        | Intra-B-O         | B-O <sub>(W, Dual)</sub> | B-O <sub>(W, Don.)</sub> | B-O <sub>(W, Acc.)</sub> | B-B   |                          |                 |
| HB2W6A  | MCMP-L | 0.000  | 1.368             | 3.214                    | 3.352                    | 3.657                    | 4.398 | -15.56                   | 8.88            |
| HB2W6B  | MCMP-A | 24.683 | 1.367             | 3.217                    | 3.543                    | 3.712                    | 4.444 | -24                      | 0.44            |
| HB2W6C  | SMP-A  | 13.028 | 1.367             | /                        | 3.608                    | 3.785                    | 6.626 | -23.62                   | 0.82            |
| HB2W6D  | SMP-D  | 0.001  | 1.367             | 3.192                    | 3.576                    | 3.704                    | 5.69  | -18.12                   | 6.32            |
| HB2W6E  | MCMP-O | 0.000  | 1.368             | 3.241                    | 3.643                    | 3.667                    | 4.465 | -14.83                   | 9.61            |
| HB2W6F  | MCMP-E | 0.013  | 1.367             | 3.326                    | 3.501                    | 3.622                    | 4.343 | -19.53                   | 4.91            |
| HB2W6G  | BCMP-C | 0.452  | 1.366             | /                        | 3.456                    | 3.696                    | 4.016 | -21.63                   | 2.81            |
| HB2W6H  | PSMP-B | 0.007  | 1.368             | 3.221                    | 3.498                    | 3.732                    | 3.676 | -19.12                   | 5.32            |
| HB2W6I  | MCMP-D | 0.033  | 1.366             | /                        | 3.503                    | 3.66                     | 4.645 | -20.09                   | 4.35            |
| HB2W6J  | MCMP-F | 0.01   | 1.367             | 3.221                    | 3.554                    | 3.643                    | 4.744 | -19.38                   | 5.06            |
| HB2W6K  | PSMP-D | 0.000  | 1.369             | 3.229                    | 3.543                    | 3.959                    | 3.372 | -15.83                   | 8.61            |
| HB2W6L  | BCMP-F | 0.003  | 1.367             | 3.152                    | 3.528                    | 3.475                    | 4.04  | -18.63                   | 5.81            |
| HB2W6M  | SMP-B  | 4.402  | 1.367             | 3.2                      | 3.598                    | 3.756                    | 6.157 | -22.98                   | 1.46            |
| HB2W6N  | MCMP-C | 0.085  | 1.367             | 3.219                    | 3.575                    | 3.847                    | 4.844 | -20.64                   | 3.80            |
| HB2W6O  | BCMP-G | 0.000  | 1.367             | 3.223                    | 3.42                     | 3.577                    | 4.004 | -17.24                   | 7.20            |
| HB2W6P  | BCMP-A | 52.194 | 1.366             | /                        | 3.545                    | 4.075                    | 4.078 | -24.44                   | 0.00            |
| HB2W6Q  | MCMP-B | 0.093  | 1.367             | /                        | 3.469                    | 3.532                    | 4.552 | -20.69                   | 3.75            |
| HB2W6R  | BCMP-B | 4.286  | 1.366             | 3.210                    | 3.494                    | 3.82                     | 4.09  | -22.96                   | 1.48            |
| HB2W6S  | BCMP-E | 0.017  | 1.367             | 3.208                    | 3.669                    | 3.858                    | 4.085 | -19.68                   | 4.76            |
| HB2W6T  | BCMP-D | 0.122  | 1.368             | 3.218                    | 3.668                    | 3.738                    | 4.089 | -20.86                   | 3.58            |
| HB2W6U  | MCMP-M | 0.000  | 1.367             | 3.203                    | 3.514                    | 4.041                    | 4.777 | -16.73                   | 7.71            |
| HB2W6V  | PSMP-C | 0.000  | 1.368             | 3.183                    | 3.513                    | 3.814                    | 3.407 | -15.87                   | 8.57            |
| HB2W6W  | MCMP-H | 0.005  | 1.368             | 3.185                    | 3.44                     | 3.878                    | 4.652 | -18.98                   | 5.46            |
| HB2W6X  | MCMP-I | 0.005  | 1.367             | 3.201                    | 3.542                    | 3.954                    | 4.494 | -18.91                   | 5.53            |
| HB2W6Y  | PSMP-A | 0.007  | 1.368             | 3.233                    | 3.436                    | 3.894                    | 3.676 | -19.13                   | 5.31            |
| HB2W6Z  | SMP-C  | 0.538  | 1.368             | 3.208                    | 3.56                     | 3.805                    | 6.638 | -21.73                   | 2.71            |
| HB2W6ZA | MCMP-J | 0.005  | 1.367             | 3.181                    | 3.547                    | 4.006                    | 4.252 | -19.35                   | 5.09            |
| HB2W6ZB | MCMP-K | 0.001  | 1.368             | 3.257                    | 3.582                    | 3.853                    | 4.775 | -19                      | 5.44            |
| HB2W6ZC | MCMP-G | 0.010  | 1.367             | 3.207                    | 3.552                    | 3.751                    | 4.258 | -18.05                   | 6.39            |

5 \* $\Delta G_{solv}$  is the hydration free energy in the aqueous phase. All energies are in kcal mol<sup>-1</sup> at a temperature of  
6 298.15 K and a pressure of 1 atm.

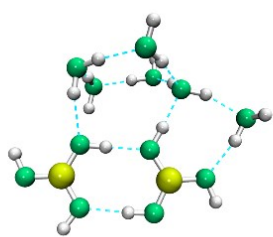

**BCIP-A**

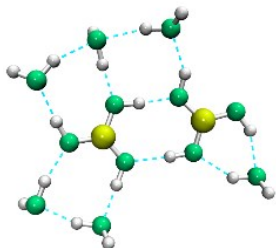

**BCIP-B**

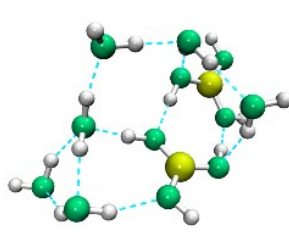

**BCIP-C**

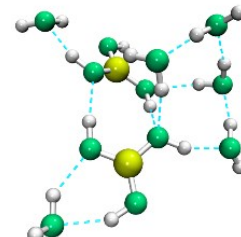

**BCIP-D**

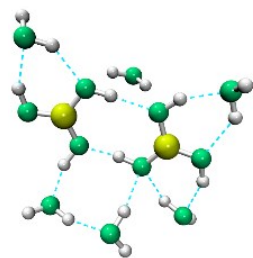

**BCIP-E**

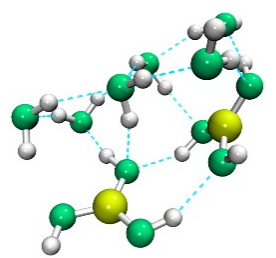

**BCIP-F**

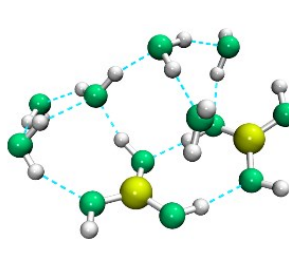

**BCIP-G**

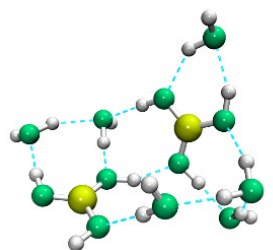

**MCIP-A**

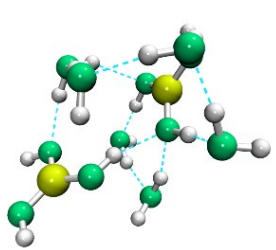

**MCIP-C**

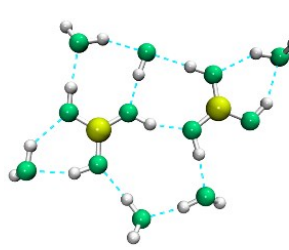

**MCIP-D**

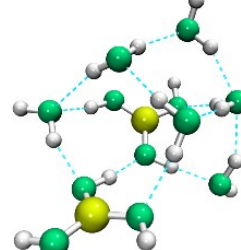

**MCIP-E**

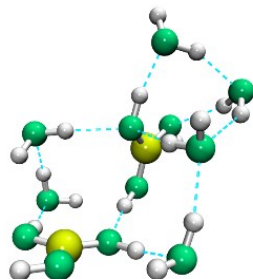

**MCIP-F**

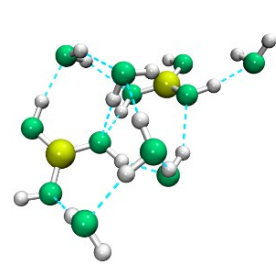

**MCIP-G**

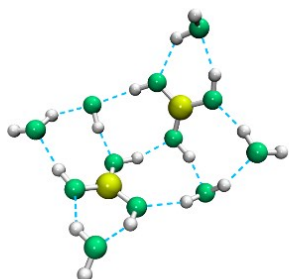

**MCIP-I**

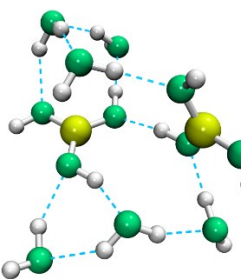

**MCMP-J**

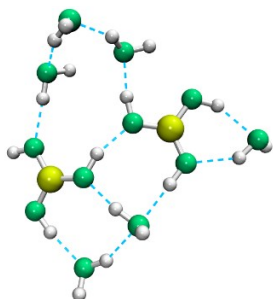

**MCMP-K**

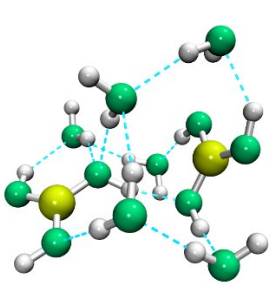

**MCMP-L**

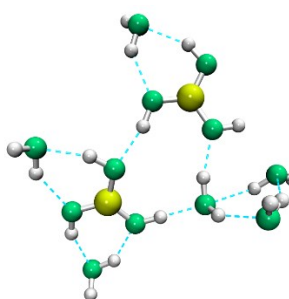

**MCMP-M**

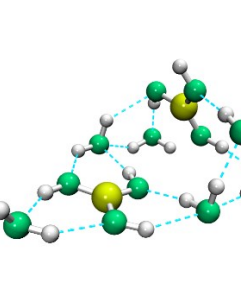

**MCMP-O**

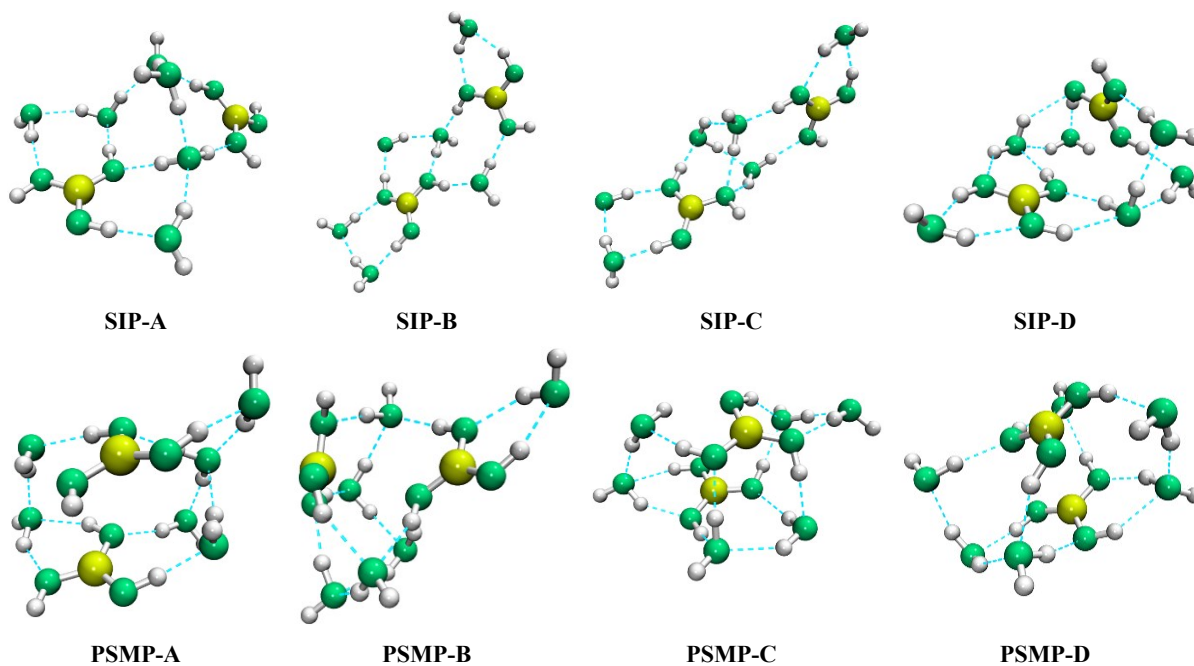

1 **Fig. S3.** More optimized lowest-energy structures of  $2\text{B}(\text{OH})_3 \cdot 6\text{H}_2\text{O}$  clusters at the  
 2  $\omega\text{B97XD}/6\text{-311++g}(3\text{df},3\text{pd})$  level. The yellow, green, and white balls are B, O, and H atoms, respectively.

3

#### 4 **4. Ployborate Distribution in Aqueous $\text{H}_3\text{BO}_3$ Solutions**

5 The polyborate distribution in aqueous  $\text{H}_3\text{BO}_3$  solutions at different temperatures was  
 6 calculated using measured pH (the acidity has been adjusted to the pD by  $\text{pD} = \text{pH} + 0.4^4$ ) and  
 7 literature equilibrium constants<sup>5,6</sup> by Newton iteration algorithm, as Fig. S4 shows. The  $\delta$  is the  
 8 mole of boron for individual polyborate divided by the moles of total boron<sup>7,8</sup>.

9 In aq.  $\text{H}_3\text{BO}_3$  solutions, boron dominantly exist as  $\text{B}(\text{OH})_3$  (over 95%), other polyborate  
 10 anions are less than 5%. The  $\text{B}_5\text{O}_6(\text{OH})_4^-$  is the second important polyborate, and it's hydration  
 11 has been discussed in our previous work<sup>7</sup>.

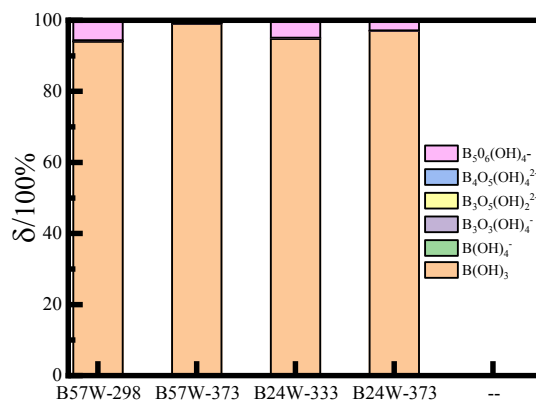

12

13

**Figure S4.** Polyborate distribution in aqueous  $\text{H}_3\text{BO}_3$  solutions at different temperatures

# 1 5. Structure of Crystalline Orthoboric Acid (H<sub>3</sub>BO<sub>3</sub>)

2

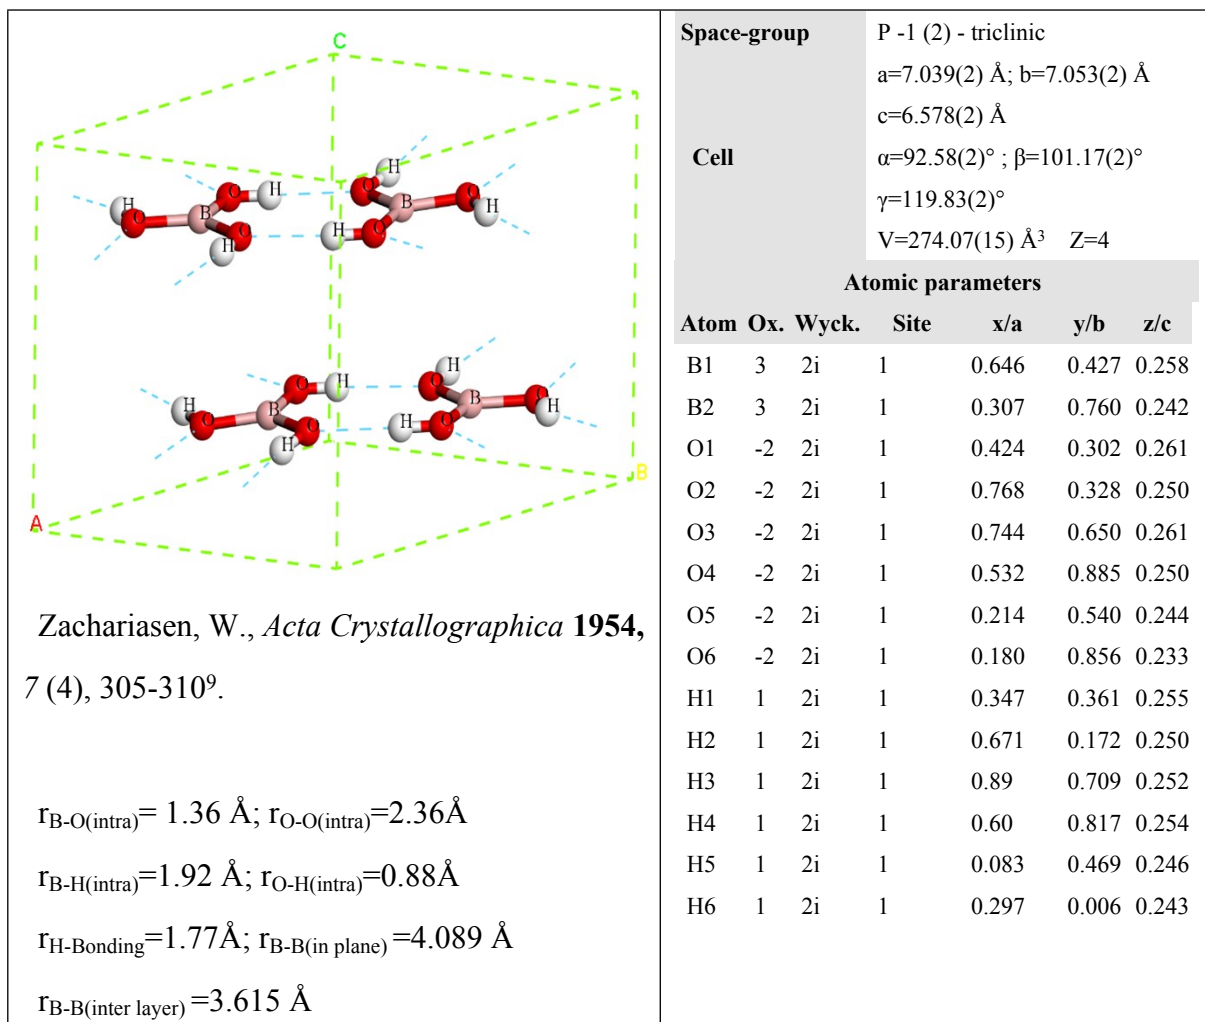

3

4

5

6

7

8

9

10

11

12

## 1 6. The Structure of Bulk Water in Aqueous H<sub>3</sub>BO<sub>3</sub> Solutions

2 The pair distribution functions of O<sub>(w)</sub>-O<sub>(w)</sub> in aqueous H<sub>3</sub>BO<sub>3</sub> solutions are shown in Fig.  
 3 S5 (a). The first-neighbor O<sub>(w)</sub>-O<sub>(w)</sub> peak is observed at ~2.73 Å, which is consistent well with  
 4 the literature.<sup>3, 10</sup> The first O<sub>(w)</sub>-O<sub>(w)</sub> peak shows none sensitive to the temperature and  
 5 concentration. The averaged coordination number of O<sub>(w)</sub>-O<sub>(w)</sub> is 4.36±1.04 in B57W-298,  
 6 about 3.92 (1.96+0.98×2) of them H-bond with the central water molecule. About 1/10 of the  
 7 water molecules (0.44) act as the “interstitial water”, which enters the first layer but does not  
 8 directly bond with the central water molecule. Our previous work<sup>11</sup> shows there are 1/3 water  
 9 molecules (1.6) act as the “interstitial water” in pure water. Thus, we can deduce that the near  
 10 local structure of bulk water keeps stable in aqueous H<sub>3</sub>BO<sub>3</sub> solution, the main feature is the  
 11 “interstitial water” molecules goes into the B(OH)<sub>3</sub> hydration sphere. The hydration numbers  
 12 derived from  $g_{O(W)-O(W)}(r)$  decrease to 4.28±1.09 in B57W-373 with elevated temperature, and  
 13 to 4.27±1.11 in B24W-333 with increasing concentration. The second sphere can be identified  
 14 which spans from 3.39-5.64Å, with the CN ~18. A more vaguer third sphere can be assigned  
 15 also, however, it's too vague to do further to analysis their CNs.

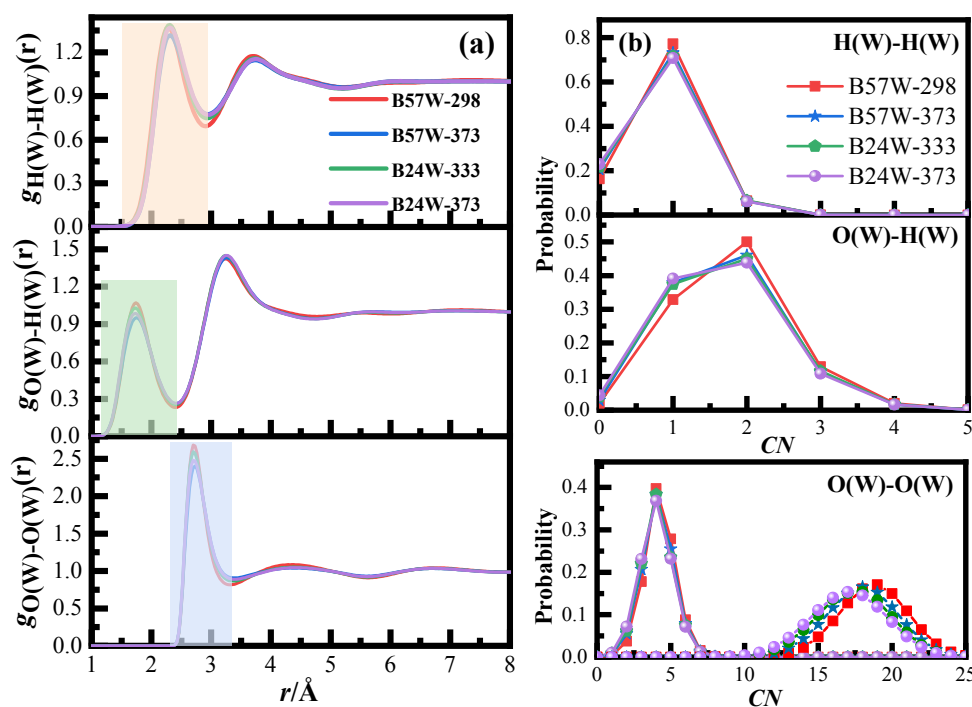

16

17 **Fig. S5.** Pair distribution functions (a) and the coordination number distributions (b) of bulk  
 18 water related interactions.



1 The SDFs of the water molecule around a central water molecule in aqueous  $\text{H}_3\text{BO}_3$   
2 solutions are shown in Fig.S6, where the range for each shell is defined as the local minimum  
3 of the  $\text{O}_{(w)}\text{-O}_{(w)}$  pair correlation functions.

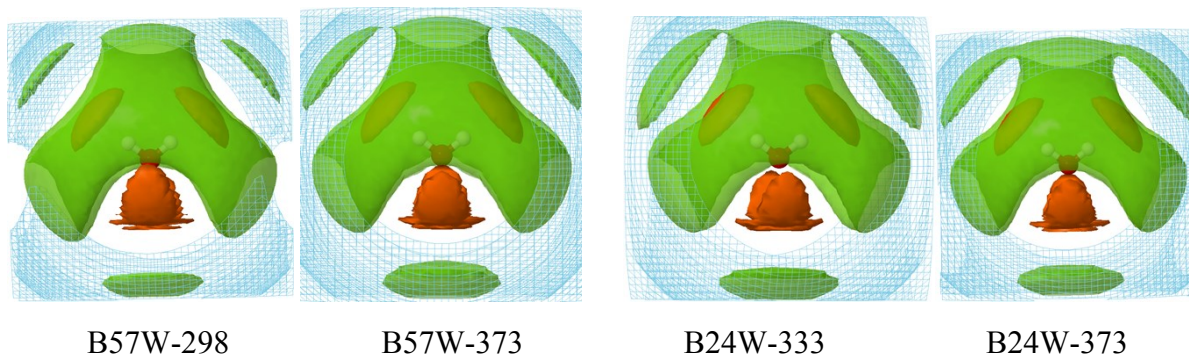

7 **Fig. S6.** Spatial density distribution functions of the neighbouring water molecules around a  
8 central water molecule. The brick-red lobes represent the first sphere within the distance limits  
9 of 0-3.39 Å, the greyish green and semi-transparent ones to the second sphere within the distance  
10 limits of 3.39 -5.50 Å, and the blue meshed ones to the third sphere within the distance limits  
11 of 5.50-8.0 Å. The red and white balls in the center represent O and H atoms of  $\text{H}_2\text{O}$ ,  
12 respectively. A contour level of 35% was chosen for all the three water spheres, respectively.

13 As Fig. S6 shows, when the concentration and temperature increase, the first shell keeps  
14 the tetrahedral coordination accompanied with none obvious change in the distribution range  
15 indicates the tendency for keeping a tetrahedron structure of the first sphere is unaffected to  
16 some extent. The greyish green and semitransparent lobes of the second sphere diffuse in a  
17 larger range, compared with those at low  $\text{H}_3\text{BO}_3$  concentration and lower temperature. In the  
18 limited temperature range of 298 -373 K, the temperature effects are slight in the SDFs for the  
19 first sphere, while much more significant effect is observed for the second and the third spheres.

20  
21  
22  
23  
24  
25  
26

## 1 7. ESP of B(OH)<sub>3</sub> and Water by DFT and Wave Function Analysis

2 The quantitatively electrostatic potentials (ESP) on the 0.001 au molecular surfaces of  
3 B(OH)<sub>3</sub> and H<sub>2</sub>O molecular is calculated by DFT at 6-311G(d, p) with Gaussian 16B<sup>12</sup> and  
4 wave function analysis with Mutiwfn<sup>13</sup>.

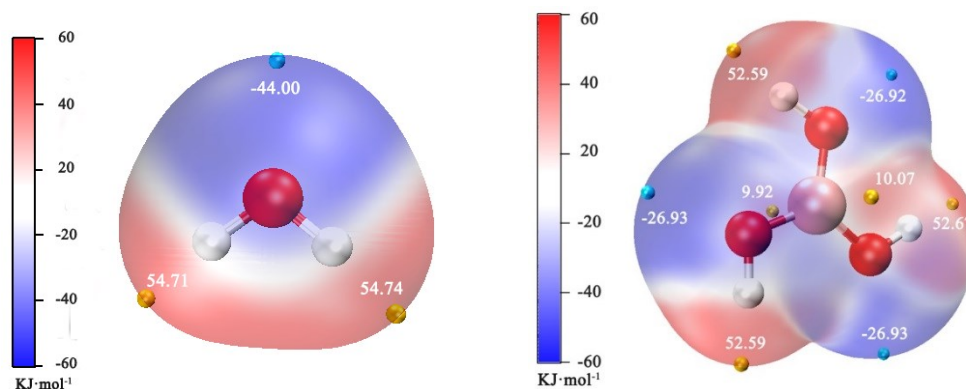

6 **Fig. S7.** the computed electrostatic potentials on the 0.001 au molecular surfaces of H<sub>2</sub>O (left) and  
7 B(OH)<sub>3</sub> (right) molecules. The yellow and celeste hemispheres indicate the positions of the most  
8 positive and negative potentials, respectively.

9

## 10 8. Angular Distribution Function (ADF) for H-bonds

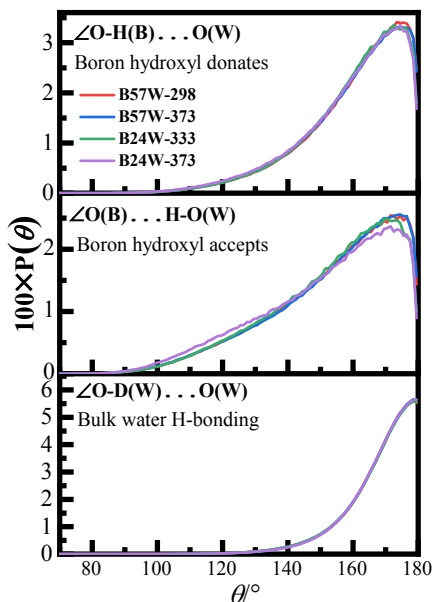

11

12 **Fig. S8.** Normalized probability distributions for the hydrogen bonding related with B(OH)<sub>3</sub>  
13 hydration *i.e.*  $\angle O-H(B) \dots O(W)$  and  $\angle O(B) \dots H-O(W)$ , and for the hydrogen bonding in bulk  
14 water *i.e.*  $\angle O-D \dots D(W)$  at different H<sub>3</sub>BO<sub>3</sub> concentrations and temperatures.

1 The directionality of H-bonds in bulk water and B(OH)<sub>3</sub> hydration is examined through the  
2 angular distribution function (ADF). As Fig. S8 of SI shows, all the interactions of H-bonds are  
3 predominantly linear with the  $\angle$ O-H(W)...O(W) peak at  $\sim 180^\circ$ , matching what would be  
4 expected for H-bonds in the bulk water. Both  $\angle$ O-H(B)...O(W) (boron hydroxyl donates) and  
5  $\angle$ O(B)...H-O(W) (boron hydroxyl accepts) angle distributions have a peak at  $180^\circ$ , while they  
6 are much wider span than the H-bonds in bulk water, indicating more flexibility and less  
7 directionality comparing with the hydrogen bonding between water molecules. It reflects a  
8 slightly weaker bond compared with the H-bonds between water molecules, and it is well  
9 consistent with the ESP of H<sub>3</sub>BO<sub>3</sub> and water also.

10

## 11 **9. B(OH)<sub>3</sub> Molecular Clusters in Aq. Solutions**

12 B(OH)<sub>3</sub> association can be derived from  $g_{B-B}(r)$ ,  $g_{B-O(B)}(r)$ , and  $g_{O(B)-O(B)}(r)$  *etc.* (Fig. S9). There  
13 are peaks at  $\sim 4.1$  Å,  $\sim 3.7$  Å and  $\sim 1.9$  Å definitely indicates the existence of B(OH)<sub>3</sub> molecular clusters.  
14 Details information about the  $g_{B-B}(r)$  has been discussed in the MS. B(OH)<sub>3</sub> have triangular  
15 configuration. As the Fig. S9 shows, there is a peak at  $\sim 3.7$  Å and a shoulder around  $5.28$  Å in the  $g_{B-}$   
16  $_{O(B)}(r)$ , which can be assigned to the O(B) which contact with other B(OH)<sub>3</sub> directly through H-bonds  
17 and the O(B) that doesn't contact with the B(OH)<sub>3</sub> directly, respectively. The interaction number with  
18 the local minimum ( $7.05$  Å) as the cut off distance increase with temperature and concentration (Table  
19 3). Here, we must reiterate the cut-off distance sensitive of the  $g_{B-O(B)}(r)$ , the *CN* must be considered  
20 cautiously. A more reliable interaction numbers can be derived from  $g_{O(B)-H(B)}(r)$ , as Table 3 shows, the  
21 same as  $g_{B-O(B)}(r)$ , we can get the conclusion that both temperature and concentration intensifies the  
22 association between B(OH)<sub>3</sub> molecules. In aqueous solution B(OH)<sub>3</sub>, hydration and B(OH)<sub>3</sub> association  
23 are competition processes, temperature and concentration have an opposite effect for B(OH)<sub>3</sub> hydration  
24 and association.

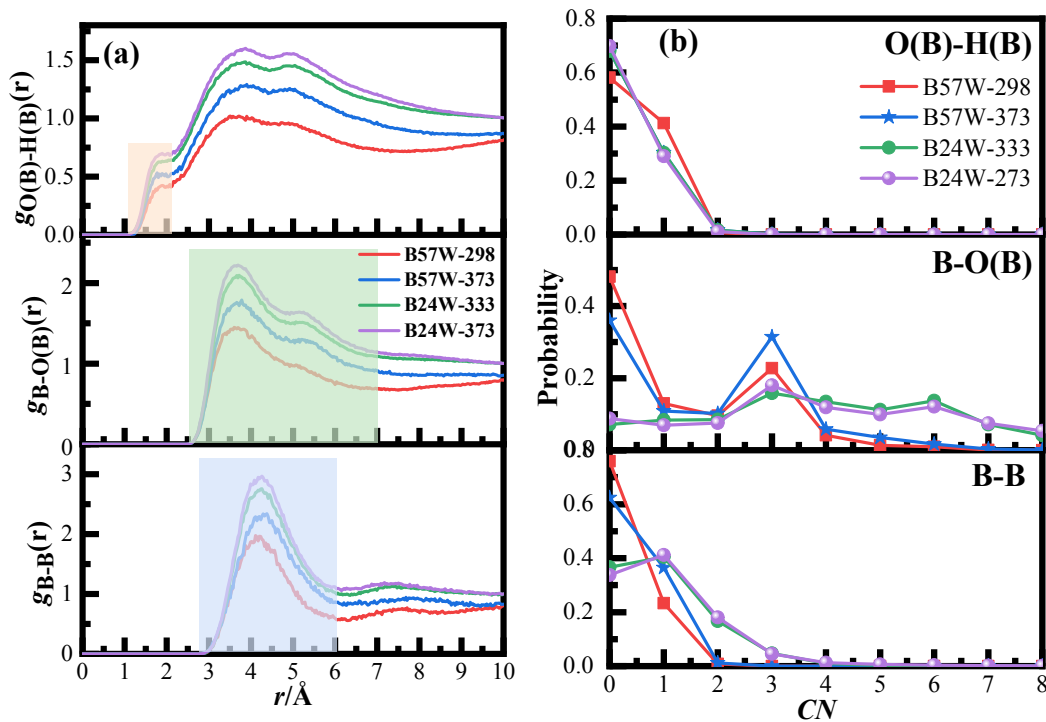

1

2 **Fig. S9.** Pair distribution functions (a) and the coordination number distributions (b) of  $B(OH)_3$   
 3 hydration related interactions.

4

### 5 **10. Multi-peak Fitting for $g_{B-B}(r)$**

6 The peak analyzer plug-in in Originlab™ 9.5 software was employed to get the property  
 7 of a specific interaction's PDF peak by deconvolving the diffused  $g_{B-B}(r)$  first peak. In fact, all  
 8 methodology for deconvolving the diffuse peaks requires a certain mathematical model to  
 9 describe the peak shape characteristics of the components. Here, the most frequently used  
 10 Gaussian function (as follows) is chosen in the present work.

$$y = y_0 + \frac{Ae^{-\frac{4 \ln(2)(x - x_c)^2}{w^2}}}{w \sqrt{\frac{\pi}{4 \ln(2)}}}$$

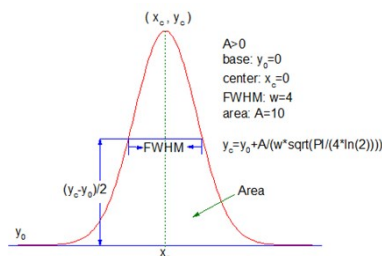

11 where  $A$  is the peak area,  $x_c$  is the peak position, and  $w$  is the full width at half maximum  
 12 (FWHM). The  $A$ ,  $x_c$  and  $w$  obtained through deconvolution reflect the coordination number  
 13 (qualitatively), the interaction distance and the disorder degree (temperature factor)

1 respectively.

2 **Table S5.** Multi-peak fitting parameters of  $g_{B-B}(r)$ .

| Sample                                 | Peaks | Center/Å | FWHM /Å | Hight   | Area    | Area/% |
|----------------------------------------|-------|----------|---------|---------|---------|--------|
| B57W-298<br>(R <sup>2</sup> = 0.99712) | PSMP  | 3.6683   | 0.67156 | 0.55375 | 0.39585 | 15.47  |
|                                        | BCMP  | 4.17561  | 0.99157 | 1.23957 | 1.30836 | 51.12  |
|                                        | MCMP  | 4.78265  | 1.39219 | 0.5771  | 0.85523 | 33.41  |
| B57W-373<br>(R <sup>2</sup> = 0.99751) | PSMP  | 3.66876  | 0.6848  | 0.48875 | 0.35627 | 11.59  |
|                                        | BCMP  | 4.19067  | 0.96727 | 1.44062 | 1.48329 | 48.25  |
|                                        | MCMP  | 4.86145  | 1.34023 | 0.86569 | 1.23481 | 40.16  |
| B24W-333<br>(R <sup>2</sup> = 0.99909) | PSMP  | 3.7495   | 0.67332 | 0.85532 | 0.61303 | 17.03  |
|                                        | BCMP  | 4.23354  | 0.95337 | 1.58703 | 1.61056 | 44.75  |
|                                        | MCMP  | 4.85093  | 1.39424 | 0.92685 | 1.37555 | 38.21  |
| B24W-373<br>(R <sup>2</sup> = 0.99913) | PSMP  | 3.76945  | 0.70199 | 0.99501 | 0.61351 | 15.98  |
|                                        | BCMP  | 4.26532  | 0.96454 | 1.70859 | 1.75423 | 45.68  |
|                                        | MCMP  | 4.86866  | 1.39227 | 0.90636 | 1.47277 | 38.35  |

3

4 \* PSMP, BCMP and MCMP are paralleled-solvent-shared molecular pairs, bi-dentate contact  
5 molecular pair, and the mono-dentate contact molecular pair, respectively.

6

## 7 **11. Weak Interaction in Crystalline Orthoboric Acid**

8 Weak interactions in crystalline orthoboric acid were revealed through RDG and  
9  $\text{Sign}(k_2) \cdot q$  function. The electron density of the unit cell is reproduced by B3LYP/6-31G(d, p)  
10 calculation with Gaussian 16B<sup>12</sup>. The Multiwfn software<sup>13</sup> to get the reduced density gradient  
11 (RDG) and  $\text{Sign}(\lambda_2) \cdot \rho$  function<sup>14</sup>, VMD is used to plot the graphs<sup>15</sup>. As Fig. S10 shows, the  
12 electrostatic H-bond interaction is the dominant interaction in the layer, while interlayer the van  
13 der Waals interaction is dominated.

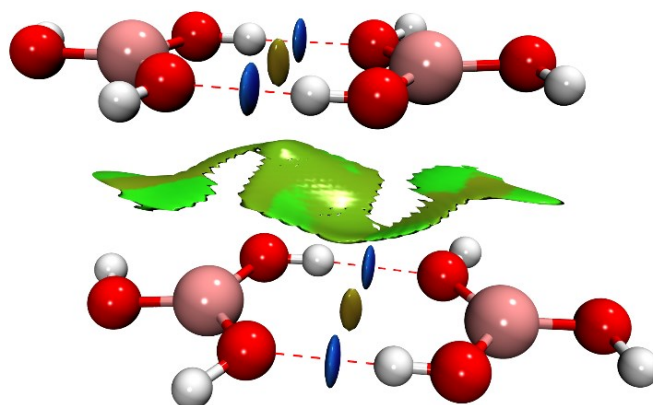

1

2 **Fig. S10.** Reduced density gradient isosurface map with isovalue of 0.5 for crystalline  
 3 orthoboric acid ( $\text{H}_3\text{BO}_3$ ). The value of  $\text{Sign}(\lambda_2) \cdot \rho$  in surfaces is represented by filling color  
 4 according to the color bar in the bottom. The pink, red, and white ball is boron, oxygen, and  
 5 hydrogen atoms, respectively; the red dot line is the hydrogen bond.

6

## 7 **References**

- 8 1. N. P. Nies and R. W. Hulbert, *J. Chem. Eng. Data*, 1967, **12**, 303-313.  
 9 2. F. Risplendi, F. Raffone, L.-C. Lin, J. C. Grossman and G. Cicero, *J. Phys. Chem. C*, 2020, **124**, 1438-1445.  
 10 3. A. K. Soper, *Chem. Phys.*, 2000, **258**, 121-137.  
 11 4. K. A. Rubinson, *Anal. Methods*, 2017, **9**, 2744-2750.  
 12 5. R. E. Mesmer, C. F. Baes and F. H. Sweeton, *Inorg. Chem.*, 1972, **11**, 537-543.  
 13 6. O. Weres, *J. Solution Chem.*, 1995, **24**, 409-438.  
 14 7. Y. Zhou, C. Fang, Y. Fang and F. Zhu, *Spectrochim. Acta Part A*, 2011, **83**, 82-87.  
 15 8. C. Fang, Y. Zhou, Y. Fang, F. Zhu, Q. Chen, H. Ge., *J. Chem. Soc. Pakistan*, 2013, **35**, 1066-1072.  
 16 9. W. Zachariasen, *Acta Crystallog.*, 1954, **7**, 305-310.  
 17 10. T. Yamaguchi, K. Fujimura, K. Uchi, K. Yoshida and Y. Katayama, *J. Mol. Liq.*, 2012, **176**, 44-51.  
 18 11. Y. Zhou, T. Yamaguchi, K. Ikeda, C. Fang, K. Yoshida, W. Zhang, F. Zhu, H. Liu, G. Wang, *Chem. Bull.*,  
 19 2020, **83**(5),434-441.  
 20 12. M. J. Frisch, G. W. Trucks, H. B. Schlegel, G. E. Scuseria, M. A. Robb, J. R. Cheeseman, G. Scalmani, V.  
 21 Barone, G. A. Petersson, H. Nakatsuji, X. Li, M. Caricato, A. V. Marenich, J. Bloino, B. G. Janesko, R.  
 22 Gomperts, B. Mennucci, H. P. Hratchian, J. V. Ortiz, A. F. Izmaylov, J. L. Sonnenberg, Williams, F. Ding, F.  
 23 Lipparini, F. Egidi, J. Goings, B. Peng, A. Petrone, T. Henderson, D. Ranasinghe, V. G. Zakrzewski, J. Gao, N.  
 24 Rega, G. Zheng, W. Liang, M. Hada, M. Ehara, K. Toyota, R. Fukuda, J. Hasegawa, M. Ishida, T. Nakajima, Y.  
 25 Honda, O. Kitao, H. Nakai, T. Vreven, K. Throssell, J. A. Montgomery Jr., J. E. Peralta, F. Ogliaro, M. J.  
 26 Bearpark, J. J. Heyd, E. N. Brothers, K. N. Kudin, V. N. Staroverov, T. A. Keith, R. Kobayashi, J. Normand, K.  
 27 Raghavachari, A. P. Rendell, J. C. Burant, S. S. Iyengar, J. Tomasi, M. Cossi, J. M. Millam, M. Klene, C.  
 28 Adamo, R. Cammi, J. W. Ochterski, R. L. Martin, K. Morokuma, O. Farkas, J. B. Foresman and D. J. Fox,  
 29 *Gaussian, Inc., Wallingford CT, 2016*.  
 30 13. T. Lu and F. Chen, *J. Comput. Chem.*, 2012, **33**, 580-592.  
 31 14. E. R. Johnson, S. Keinan, P. Mori-Sánchez, J. Contreras-García, A. J. Cohen and W. Yang, *J. Am. Chem.*  
 32 *Soc.*, 2010, **132**, 6498-6506.  
 33 15. W. Humphrey, A. Dalke and K. Schulten, *J. Mol. Graph. Model.*, 1996, **14**, 33-38.
